# Supplementary material
Source: PubMed Central journal article supplement (PMC1899922)
Supplement: molcellb_27_8_3098__1.pdf [file molcellb_27_8_3098__1.pdf]

# Chk1-mediated Phosphorylation of FANCE is Required for the Fanconi Anemia/BRCA Pathway

XiaoZhe Wang<sup>1</sup>, Richard Kennedy<sup>1</sup>, Kallol Ray<sup>1</sup>, Patricia Stuckert<sup>1</sup>, Tom Ellenberger<sup>2</sup>, Alan D. D'Andrea<sup>1</sup>

- 1 Department of Radiation Oncology, Dana-Farber Cancer Institute, Harvard Medical School, Boston, MA
- 2 Department of Biochemistry and Molecular Biophysics, Washington University School of Medicine, St. Louis, MO

## Supplementary Materials and Methods

### **Mutation Analysis**

The mutations were analyzed by RT-PCR amplification of total RNA purified from DF1179 cells (FA-E) and U2OS cells (control) using the specific primer pairs, then cDNA of both cell lines were analyzed by DNA sequencing using different primers spanning from exon 1 to exon 10 of *FANCE*.

### **Supplementary Figure Legends**

**Figure S1 Mutation analysis of a fibroblast line (DF1179) derived from an FA-E patient** **A.** RT-PCR amplification of RNA purified from DF1179 (FA-E) cells and U2OS cells (control) was performed using the specific primer pairs, and cDNA products were analyzed by agarose gel electrophoresis. **B, C.** Mutation of the *FANCE* gene in FA-E fibroblast cell line (DF1179) was confirmed by direct DNA sequencing using

different primers spanning from exon 1 to exon 10 of *FANCE*. The chromatograms shown indicate a C to T point mutation at 1111 of *FANCE* results in a missense mutation (R371W, Arg to Trp). **D.** Complementation of MMC sensitivity of an FA-E fibroblast line, DF1179, with wild-type *FANCE*, but not with the double mutant of *FANCE* (TS/AA). MMC sensitivity of an FA-E fibroblast cell line, DF1179, with empty vector (pMMP), pMMP-FLAG-*FANCE*<sup>wt</sup>, pMMP-FLAG-TS/AA (the double mutant of T346A, S374A). The indicated retroviral supernatants were generated and used to transduce DF1179 cells. Puromycin-resistant cells were selected, and MMC sensitivity was determined as described in "Materials and Methods". The values shown are the mean  $\pm$  standard deviation (SD) from four separate experiments.

**Figure S2 Phospho-T346-FANCE foci formation in response to DNA damage**

**A, B.** Phospho-T346-FANCE foci formation in response to lower dose of DNA damage. HeLa cells were exposed to lower dose of DNA damage: UV (10J/m<sup>2</sup>), IR (2Gy) or MMC (40ng/ml) and incubated for different periods of time as indicated before fixation, immunofluorescence was performed using anti-pT346-FANCE antibody. Magnification  $\times$  400 (**A**). Cells with more than four distinct pT346-FANCE foci were counted as positive. 200 cells/sample were analyzed. The values shown are the mean  $\pm$  SD from three separate experiments (**B**). **C, D.** Effects of Chk1 inhibitors on phospho-T346-FANCE foci formation. HeLa cells were pretreated without or with Chk1 inhibitors Gö6976 and SB218078 (5 $\mu$ M) for 30 min, and then were exposed to UV at (60J/m<sup>2</sup>) and incubated for 3hr before fixation, immunofluorescence was performed using anti-pT346-FANCE antibody. Magnification,  $\times$  400 (**C**). Cells with more than four distinct pT346-

FANCE foci were counted as positive. 200 cells/sample were analyzed. The values shown are the mean  $\pm$  SD from three separate experiments (**D**).

**Figure S3** **A.** FA-E fibroblasts (DF1179) stably expressing empty vector (DF1179 + Vec.), wild-type FANCE (DF1179 + FLAG-FANCEwt) or the double mutant (DF1179 + FLAG-TS/AA) were either untreated or treated with UV ( $60\text{J/m}^2$ ) and incubated for 6hr, whole cell extracts were subjected to immunoprecipitation with anti-FLAG, and the immune complexes were analyzed by SDS-PAGE, followed by Western blot analysis with anti-FANCA, anti-FANCG, anti-FANCC and anti-FLAG antibodies. Heavy chain IgG was used as a loading control. **B.** U2OS, GM0637 or HEK293T cells were either untreated or treated with UV at  $60\text{ J/m}^2$  and incubated for 3hr or 8hr, and whole cell extracts were analyzed for Western blot with indicated antibodies. Anti-  $\beta$ -Tubulin blot was used as a loading control.
