# Supplementary material
Source: PubMed Central journal article supplement (PMC1899922)

**A**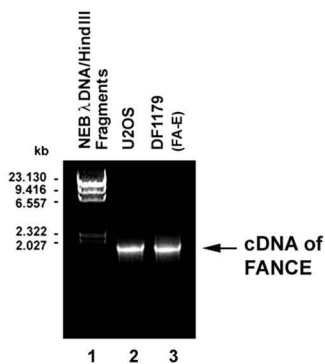**B**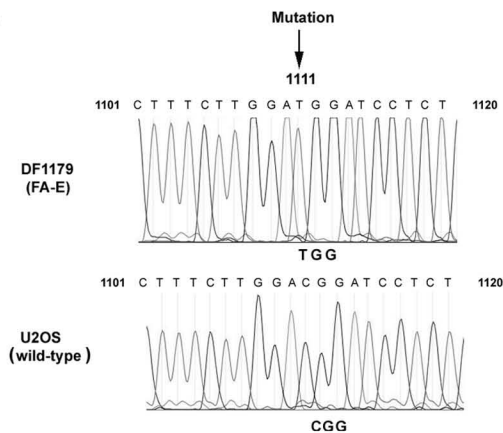**C***FANCE* mutation in DF1179 (FA-E) cells

| <i>FANCE</i> mutation | Nucleotide change | Consequence | AA Change | Exon/intron | Domain     | Type              |
|-----------------------|-------------------|-------------|-----------|-------------|------------|-------------------|
| c.1111 C>T            | CGG-to-TGG        | Arg-to-Trp  | R371W     | Exon 5      | C-terminal | Missense mutation |

**D**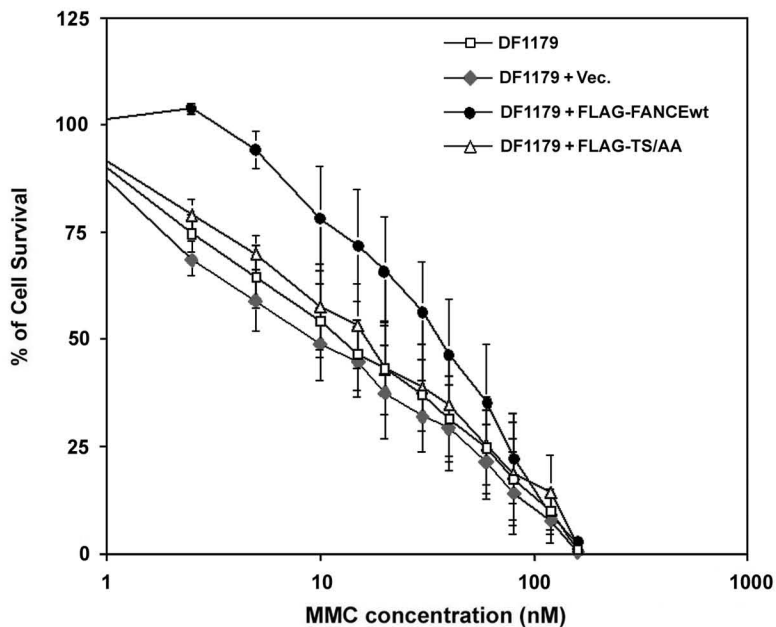

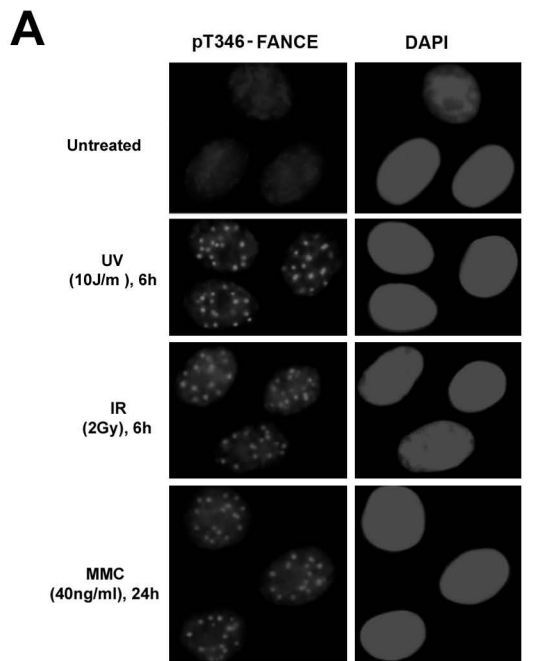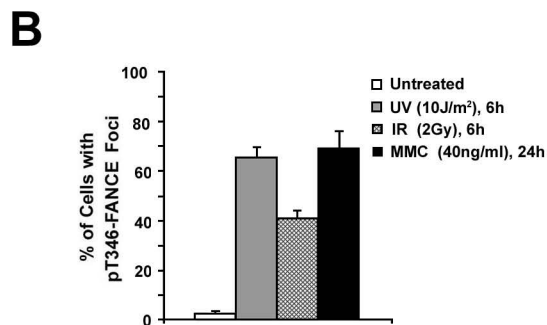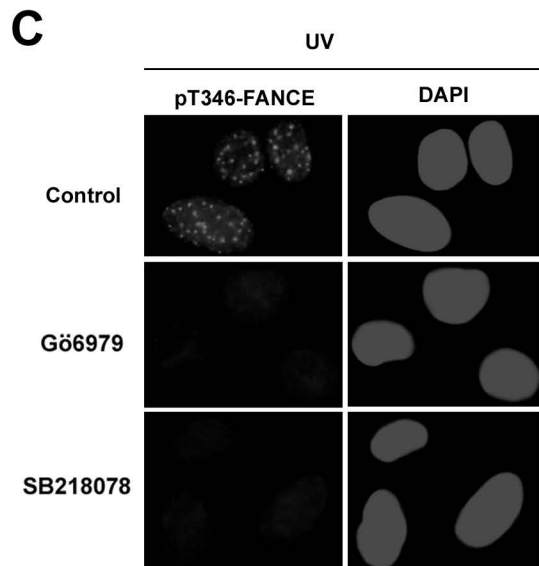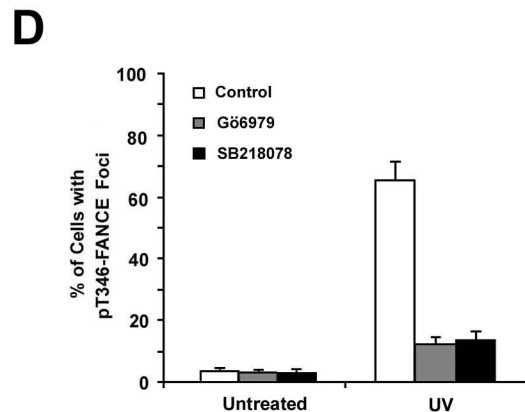

**A**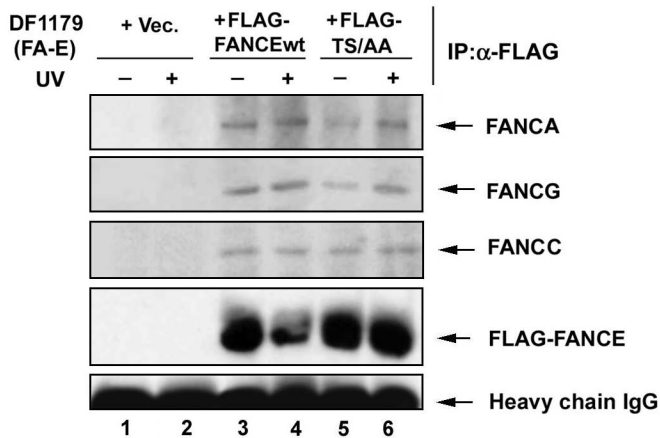**B**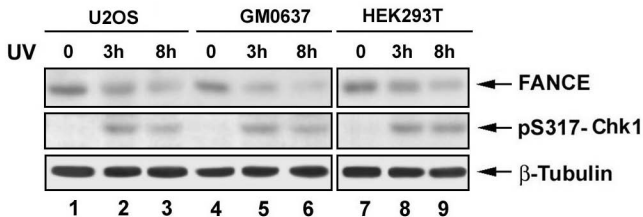

Supplement: molcellb_27_8_3098__2.pdf [file molcellb_27_8_3098__2.pdf]
